# Supplementary material
Source: PubMed Central journal article supplement (PMC5754788)
Supplement: pnas.201712711SI.pdf [file pnas.201712711SI.pdf]

# Supporting Information

Naya et al. 10.1073/pnas.1712711114

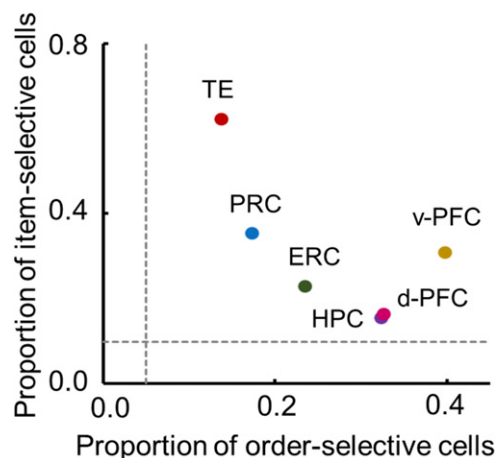

**Fig. S1.** Two-dimensional scatter plots between proportions of item cells and order-selective cells for the recording areas. Dashed gray lines indicate chance levels of item cells (horizontal,  $P = 0.0975$ ) and order-selective cells (vertical,  $P = 0.05$ ).

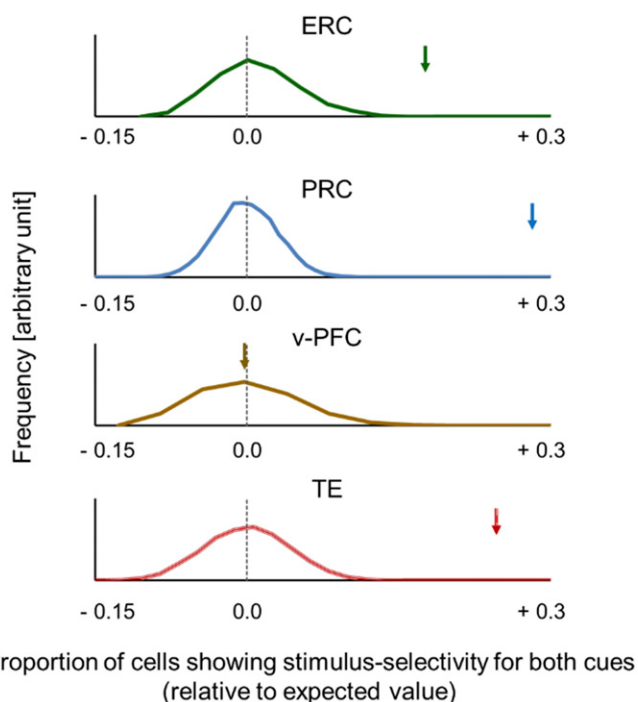

**Fig. S2.** Distribution of simulated number of conjunctive-item cells. We conducted 10,000 simulations for the number of conjunctive-item cells with the numbers of cue 1-selective cells, cue 2-selective cells, and total recorded cells fixed in each area, which were taken from the experiment (Table S1). In each simulation, cue 1-selective cells and cue 2-selective cells were randomly (independently) chosen from the total cells. If a cell was chosen as both cue-1 selective and cue-2 selective, it was regarded as a conjunctive-item cell. We counted the number of conjunctive-item cells in each simulation and determined a distribution of the numbers of conjunctive-item cells in each area. The distributions were aligned to the expected numbers of cells showing stimulus selectivity for both cue 1 and cue 2, which were theoretically given  $[(\text{cue 1-selective cells}) \times (\text{cue 2-selective cells}) / (\text{total cells})]$  and displayed as proportions from item cells. Real values are indicated by arrows. These values situated beyond the distributions for PRC and TE and at the rank of 2nd–6th in 10,000 for ERC and at the rank of 3,407th–6,544th for v-PFC. We estimated  $P$  values as  $P < 1/5,000$  for PRC and TE,  $P < 6/5,000$  for ERC, and  $P > 3,407/5,000$  for v-PFC.

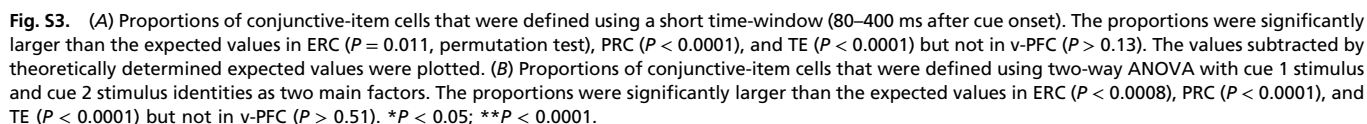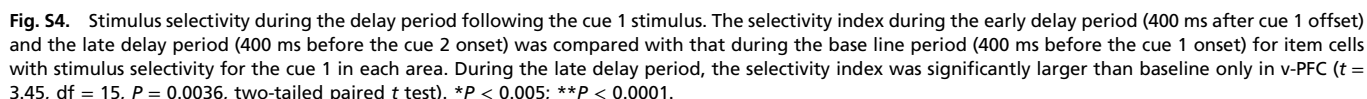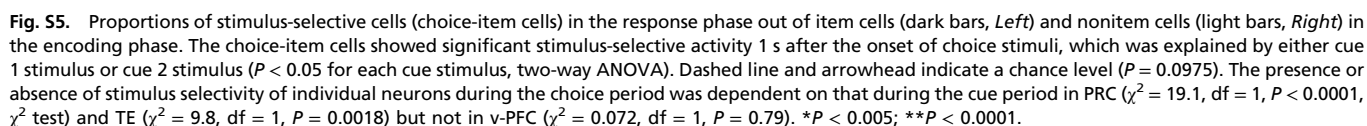



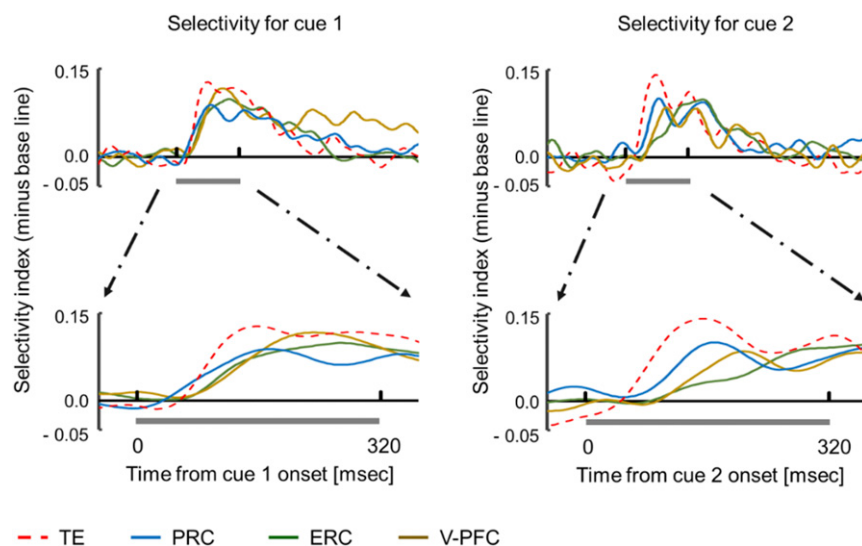

**Fig. S7.** Time courses of magnitude-adjusted population-averaged stimulus selectivity to cue 1 (*Left*) and to cue 2 (*Right*). We first examined a peak amplitude of selectivity index defined by the 200-ms time window for each item cell. The first and the third quartile points of the peak selective index of v-PFC item-selective cells were 0.31 and 0.48 for cue 1 and 0.33 and 0.44 for cue 2. To adjust the magnitude of the selectivity index for the comparison of time courses, we collected PRC item cells and TE item cells, the peak selectivity index of which was between the first and the third quartiles of the v-PFC item cells. Mean values of the selectivity index for cue 1 and cue 2 were 0.40 ( $n = 16$ ) and 0.41 ( $n = 10$ ) in v-PFC, 0.40 ( $n = 30$ ) and 0.39 ( $n = 16$ ) in PRC, and 0.40 ( $n = 10$ ) and 0.42 ( $n = 9$ ) in TE. We used all of the item cells showing stimulus selectivity for cue 1 ( $n = 29$ ) and cue 2 ( $n = 19$ ) in ERC, and their mean values were 0.45 and 0.42, respectively. The time course of the population-averaged selectivity index is displayed as values subtracted by mean values of the selectivity index during the baseline (400 ms before cue 1 onset) for both cue 1 and cue 2. TE (93 ms and 86 ms for half peak time from cue 1 onset and cue 2 onset) and PRC (89 ms and 113 ms) started to show selective activity earlier than v-PFC (146 ms and 136 ms) and ERC (121 ms and 206 ms) for both cue 1 and cue 2.

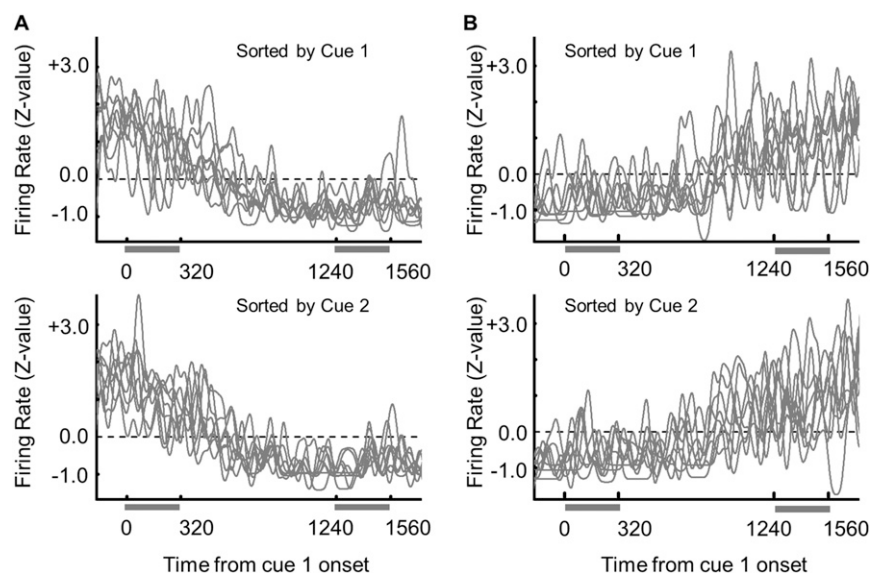

**Fig. S8.** Time courses of firing rates of the PFC order-selective neurons. (A) The d-PFC order-selective cell shown in Fig. 4A. Average SDFs ( $\sigma = 50$  ms) across trials with the same cue 1 stimuli (sorted by cue 1) and with the same cue 2 stimuli (sorted by cue 2) were standardized (z-score) from the period from 200 ms before cue 1 onset to 200 ms after cue 2 offset, respectively. (B) The v-PFC order-selective neuron shown in Fig. 4B.

**Table S1. Number of neurons showing stimulus selectivity for encoding in MTL and PFC**

| Cell group                          | HPC     | ERC     | PRC      | d-PFC  | v-PFC   | TE      |
|-------------------------------------|---------|---------|----------|--------|---------|---------|
| Total                               | 232     | 166     | 317      | 49     | 78      | 87      |
| Selective for cue 1                 | 19 (8)  | 29 (17) | 85 (27)  | 3 (6)  | 16 (21) | 49 (56) |
| Selective for cue 2                 | 19 (8)  | 19 (11) | 80 (25)  | 5 (10) | 10 (13) | 42 (48) |
| Selective for either cue 1 or cue 2 | 36 (16) | 38 (23) | 112 (35) | 8 (16) | 24 (31) | 54 (62) |
| Selective for both cue 1 and cue 2  | 2 (1)   | 10 (6)  | 53 (17)  | 0 (0)  | 2 (3)   | 37 (43) |

5 of 5
